# Supplementary material for: The Association between Immune Checkpoint Proteins and Therapy Outcomes in Acute Myeloid Leukaemia Patients
Source: MDPI journal article supplement (doi:10.3390/cancers15184487), 2023-09-09
Supplement: s1 [file s1]

**Supplementary Table S1.** Panel of antibodies used in flow cytometry.

| Antibody and Fluorochrome  | Producer         | Clone  | Volume per 200 $\mu$ L |
|----------------------------|------------------|--------|------------------------|
| CD33 FITC                  | Becton Dickinson | P67.6  | 4 $\mu$ L              |
| CD3 PE-Cy7                 | BioLegend        | UCHT1  | 2 $\mu$ L              |
| CD152 (CTLA-4) APC         | Becton Dickinson | BNI3   | 5 $\mu$ L              |
| CD276 (B7-H3) PerCP- Cy5.5 | BioLegend        | MIH42  | 4 $\mu$ L              |
| CD274 (PD-L1) BV510        | BioLegend        | 29E2A3 | 5 $\mu$ L              |
| CD279 (PD-1) PE            | Becton Dickinson | EH12.1 | 0,5 $\mu$ L            |

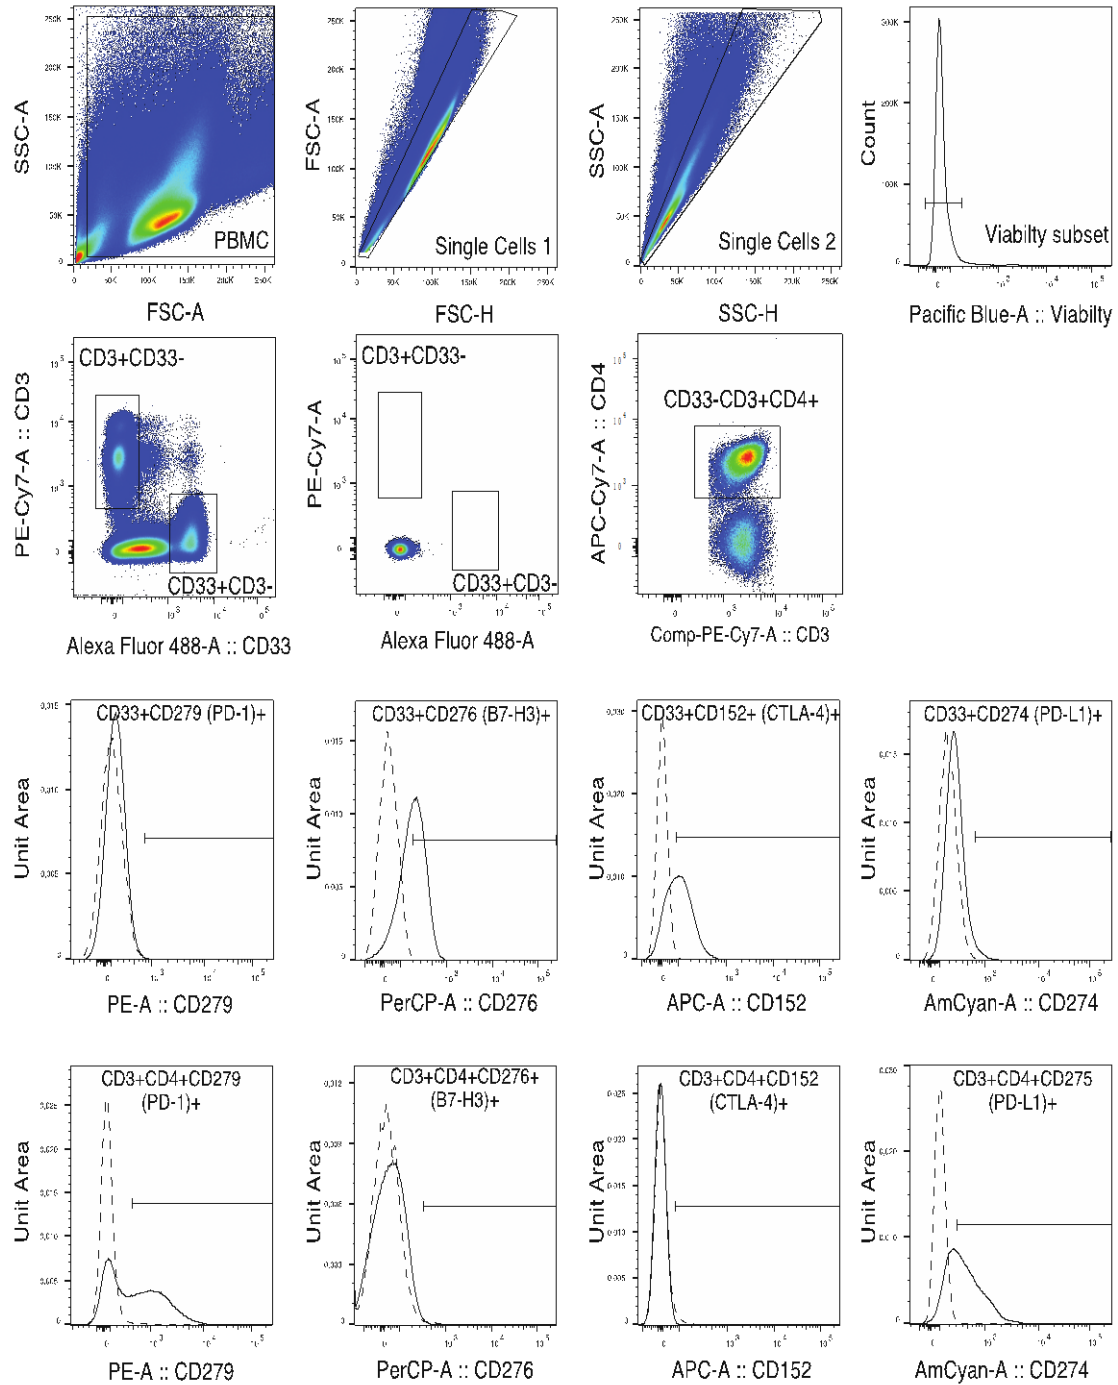

**Supplementary Figure S1.** Gating strategy implemented in the study panel.
